# Supplementary material
Source: MDPI journal article supplement (https://www.mdpi.com/2073-4344/9/6/551)
Supplement: s1 [file s1]

# Supplementary Materials: Investigation of C<sub>1</sub>+C<sub>1</sub> Coupling Reactions in Cobalt-Catalyzed Fischer-Tropsch Synthesis by a Combined DFT and Kinetic Isotope Study

Yanying Qi, Jia Yang \*, Anders Holmen and De Chen \*

## S1: The calculation method of free energy

Firstly, the equation to calculate the free energy is defined as shown.

$$G = E + E_{ZPE} + \Delta H^0(0 \rightarrow T) - TS + RT \ln\left(\frac{P}{P^0}\right)$$

Where  $G$  is free energy,  $E$  refers to electronic energy determined by DFT,  $E_{ZPE}$  is zero-point energy.  $H$  is enthalpy.  $S$  is entropy.  $T$  is temperature.  $P$  is the pressure.

$$E_{ZPE} = \sum_{i=1}^{3N-6(5)} \frac{N_A h \nu_i}{2}$$

Where  $N_A$  and  $h$  refers to Avogadro's number and Planck's constant, and  $\nu_i$  and  $N$  are the frequency of the normal mode and the number of atoms, respectively.

The evaluation of enthalpy ( $H$ ) and entropy ( $S$ ) are shown below.

The standard entropies of gas-phase species have three contributions from translational, rotational and vibrational modes. The detailed equations to calculate the entropy has been reported by Dumesic et.al<sup>2</sup> and can use the data from the handbook. The enthalpy of gas phase species also has three contributions.

$$\Delta H(T) = H_{tran} + H_{rot} + \Delta H_{vib}$$

$$\Delta H(T) = \frac{5}{2}RT + \frac{3}{2}RT \text{ (or } RT \text{ for linear molecules)} + R \sum_i^{3N-6} \frac{x_i T}{e^{x_i} - 1}$$

Where  $x_i = \frac{h\nu_i}{k_B T}$ ,  $k_B$  refers to the Boltzmann constant,  $\nu_i$  is normal-mode vibrational frequency.

As for the adsorbates, the enthalpy ( $H$ ) is equal to the internal energy ( $U$ ) with neglecting the  $PV$  contributions. For strongly adsorbed species, the frustrated translational and rotational modes are treated as special cases of vibrational modes. Accordingly, the entropy and the internal energy is evaluated according to the following equations.

$$\Delta U^0(0 \rightarrow T) = U_{vib} = R \sum_i^{3N} \frac{x_i T}{e^{x_i} - 1}$$

$$S = S_{vib} = R \sum_i^{3N} \left( \frac{x_i}{e^{x_i} - 1} - \ln(1 - e^{-x_i}) \right)$$

Where  $x_i = \frac{hc}{k_B T \lambda_i}$ ,  $c$  and  $k_B$  refer to speed of light and Boltzmann constant,  $1/\lambda_i$  is wavenumber corresponding to each vibrational frequency.

## Reference

(1) Cortright, R. D.; Dumesic, J. A., Kinetics of heterogeneous catalytic reactions: Analysis of reaction schemes. In *Adv Catal*, Academic Press: 2001; Vol. Volume 46, pp 161-264.

## S2: The formulas for KIE calculation<sup>1</sup>

Reaction rate is given:

$$r_{AB} = \frac{k_B T}{h} \exp\left(\frac{\Delta S^{0TS-IS}}{R}\right) \exp\left(-\frac{\Delta H^{0TS-IS}}{k_B T}\right) n_A n_B \quad (S1.1)$$

Kinetic isotope effect (KIE) is described as:

$$\frac{k_H}{k_D} = \frac{A_H \Omega_H}{A_D \Omega_D} \quad (S1.2)$$

Zero-point energy (ZPE) contribution to KIE (H/D) is:

$$\frac{\Omega_H}{\Omega_D} = \exp\left((-1) \frac{((ZPE_H^{TS} - ZPE_H^{IS}) - (ZPE_D^{TS} - ZPE_D^{IS}))}{k_B T}\right) \quad (S1.3)$$

Entropic contribution to KIE (H/D) (Pre-exponential factor) is obtained by:

$$\frac{A_H}{A_D} = \exp\left(\frac{((S_H^{TS} - S_H^{IS}) - (S_D^{TS} - S_D^{IS}))}{R}\right) \quad (S1.4)$$

$\Delta H$  is approximated by the energy  $\Delta E$ , which is calculated from DFT. The barriers without zero-point correction are identical for H and D, so the barrier term in the KIE only includes the zero-point energy corrections. The  $k_B T/h$  term is neglected because it does not change for H and D. Besides, the coverage term ( $n_A n_B$ ) is assumed to be identical for H and D.

All the zero-point energy and entropy are calculated from DFT.

$TS$  transition state

$IS$  initial state

$T$  reaction temperature

$k_B$  Boltzmann constant

$R$  ideal gas constant

## References

(1) Ojeda, M.; Li, A. W.; Nabar, R.; Nilekar, A. U.; Mavrikakis, M.; Iglesia, E. *J Phys Chem C* 2010, 114, 19761.

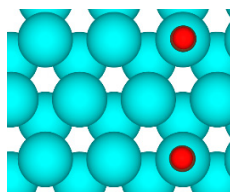

Figure S1: The stable configuration of two CO spectators on the surface

**Table S1:** Frequencies for the calculation of kinetic isotope effects

| $\text{CH}_2^* + \text{CO}^* \rightarrow \text{CH}_2\text{CO}^{*+}$ |      |      |      |      |     |     |     |     |     |     |     |     |     |     |     |
|---------------------------------------------------------------------|------|------|------|------|-----|-----|-----|-----|-----|-----|-----|-----|-----|-----|-----|
| <b>IS-H</b>                                                         | 3002 | 2716 | 1782 | 1377 | 817 | 584 | 499 | 396 | 388 | 344 | 310 | 286 | 259 | 159 | 88  |
| <b>IS-D</b>                                                         | 2204 | 1980 | 1782 | 1011 | 632 | 479 | 425 | 389 | 356 | 307 | 281 | 251 | 239 | 159 | 88  |
| <b>TS-H</b>                                                         | 3002 | 2950 | 1854 | 1349 | 920 | 856 | 515 | 483 | 462 | 386 | 361 | 182 | 129 | 59  |     |
| <b>TS-D</b>                                                         | 2221 | 2136 | 1853 | 992  | 718 | 637 | 481 | 443 | 404 | 348 | 322 | 169 | 128 | 59  |     |
| $\text{CH}^* + \text{CH}^* \rightarrow \text{CHCH}^{*+}$            |      |      |      |      |     |     |     |     |     |     |     |     |     |     |     |
| <b>IS-H</b>                                                         | 3022 | 3010 | 760  | 742  | 670 | 652 | 628 | 607 | 434 | 399 | 359 | 312 |     |     |     |
| <b>IS-D</b>                                                         | 2224 | 2214 | 607  | 593  | 576 | 560 | 509 | 492 | 399 | 372 | 332 | 294 |     |     |     |
| <b>TS-H</b>                                                         | 3049 | 3043 | 891  | 835  | 658 | 647 | 587 | 584 | 423 | 410 | 164 |     |     |     |     |
| <b>TS-D</b>                                                         | 2242 | 2239 | 704  | 597  | 566 | 556 | 513 | 483 | 380 | 368 | 157 |     |     |     |     |
| $\text{CH}^* + \text{HCO}^* \rightarrow \text{CHHCO}^{*+}$          |      |      |      |      |     |     |     |     |     |     |     |     |     |     |     |
| <b>IS-H</b>                                                         | 2998 | 2883 | 1429 | 1268 | 849 | 805 | 674 | 601 | 535 | 453 | 386 | 287 | 197 | 171 | 107 |
| <b>IS-D</b>                                                         | 2205 | 2118 | 1421 | 972  | 655 | 635 | 567 | 520 | 488 | 425 | 354 | 286 | 188 | 159 | 106 |
| <b>TS-H</b>                                                         | 3008 | 2943 | 1362 | 1255 | 942 | 800 | 617 | 541 | 535 | 400 | 346 | 285 | 194 | 135 |     |
| <b>TS-D</b>                                                         | 2209 | 2165 | 1351 | 958  | 750 | 583 | 533 | 507 | 459 | 353 | 313 | 283 | 190 | 134 |     |
